# Supplementary material
Source: PubMed Central journal article supplement (PMC2996701)
Supplement: 1007150107_pnas.1007150107_SI.pdf [file 1007150107_pnas.1007150107_SI.pdf]

# Supporting Information

Yu et al. 10.1073/pnas.1007150107

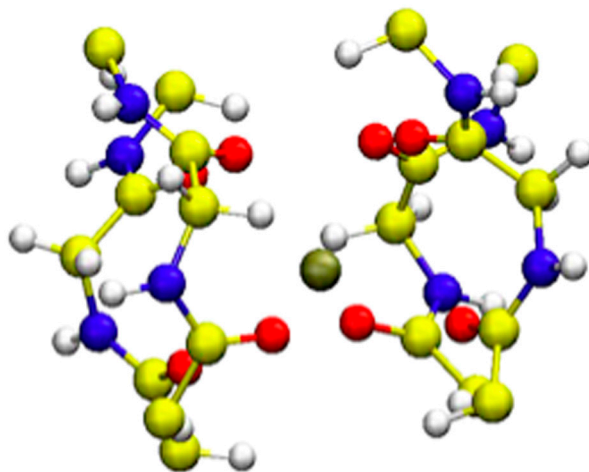

**Movie S1.** The S2 site in an all-atom molecular dynamics simulation of KcsA in a fully solvated membrane.

[Movie S1 \(MPG\)](#)

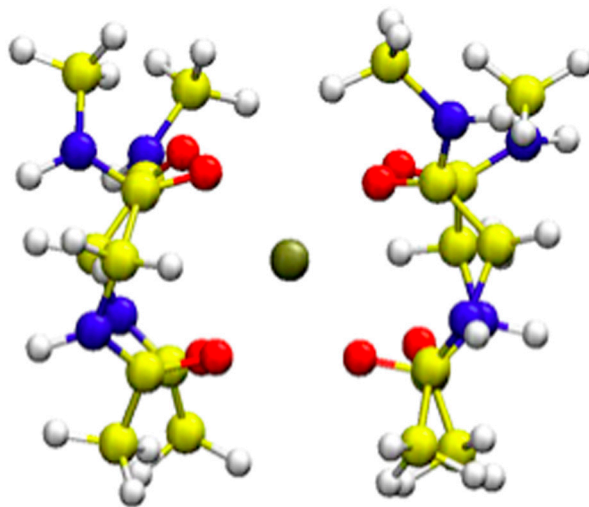

**Movie S2.** The S2 site in a molecular dynamics simulation of the reduced model enforced with the generic confinement potential according to the distribution of  $\rho_0(X)$  in Eq. 4.

[Movie S2 \(MPG\)](#)
